# Supplementary material for: Elasticity mapping of apical cell membranes
Source: Royal Society of Chemistry journal article supplement (doi:10.1039/b901714c), 2009-01-01
Supplement: b901714c.pdf [file b901714c.pdf]

# Supporting information

## Elasticity Mapping of Apical Cell Membranes

*Tamir Fine,<sup>a</sup> Ingo Mey,<sup>a</sup> Christina Rommel,<sup>b</sup> Joachim Wegener,<sup>b</sup> Claudia Steinem,<sup>c</sup> and  
Andreas Janshoff<sup>a,\*</sup>*

<sup>a</sup> Institute of Physical Chemistry, University of Göttingen, Tammannstr. 6, 37077 Göttingen, Germany, Tel. + 49 551 3910633, Fax: + 49 551 3914411, e-mail: ajansho@gwdg.de

<sup>b</sup> Institute for Analytical Chemistry, Chemo- and Biosensors, University of Regensburg, 93040 Regensburg, Germany

<sup>c</sup> Institute of Organic and Biomolecular Chemistry, University of Göttingen, Tammannstr. 2, 37077 Göttingen, Germany

**Theoretical considerations.** Bending of a thin plate with a point load force produces the following linear relationship between force  $F(h)$  and indentation depth  $h$  (Figure 1s):

$$F(h) = \frac{4\pi Et^3}{3(1-\nu^2)R_{pore}^2} h \quad (1s)$$

$E$  denotes the elastic modulus (Young's modulus),  $\nu$  the Poisson ratio ( $\nu = 0.33$ ),  $R_{pore}$  the pore radius, and  $t$  the thickness of the bilayer. If bending dominates the elastic response of a cell membrane a linear regression at low load is justified and as a consequence  $k_{app}$  is given by:

$$k_{app} = \frac{4\pi Et^3}{3(1-\nu^2)R_{pore}^2}.$$

However, stretching is a major contribution to the elastic response at larger indentation forces described by the nonlinear membrane theory (Figure 1s):

$$F = \frac{9\pi Et}{16R_{tip}^2 \left( \frac{R_{pore}}{R_{tip}} \right)^{\frac{9}{4}}} h^3. \quad (2s)$$

$R_{tip}$  is the tip radius. The linear combination of equations (1s) and (2s) provides a means to fit the data in order to obtain values for  $E$  and  $t$  (Figure 1s/2s):

$$F(h) = \frac{4\pi Et^3}{3(1-\nu^2)R_{pore}^2} h + \frac{9\pi Et}{16R_{tip}^2 \left( \frac{R_{pore}}{R_{tip}} \right)^{\frac{9}{4}}} h^3. \quad (3s)$$

The simulation clearly shows that up to an indentation depth of 50-100 nm the assumption of plate bending leading to linear force indentation curve is justified.

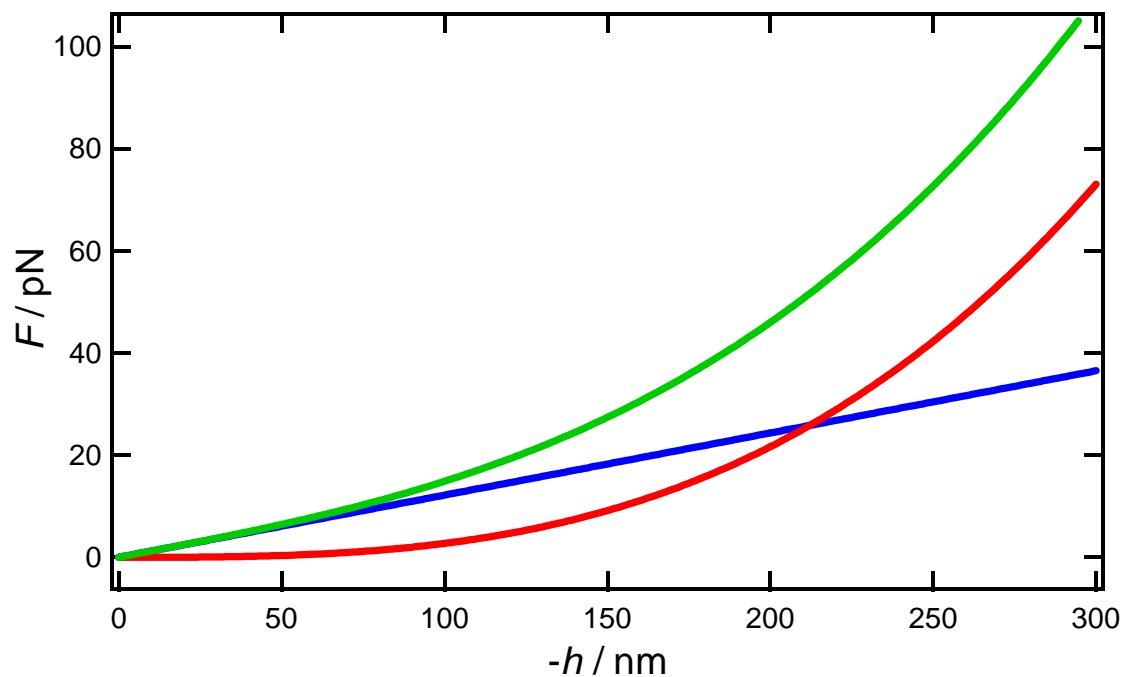

**Figure 1s.** Computed force indentation curves corresponding to equations (1s-3s). The green curve (equation 3s) is a linear combination of pure bending dominated indentation represented by the linear plate theory (equation 1s) and nonlinear membrane theory assuming that stretching occurs at higher load (equation (2s)). Parameters:  $R_{\text{pore}} = 600$  nm,  $R_{\text{tip}} = 20$  nm,  $E = 15.2$  kPa,  $\kappa = 7 \times 10^{-19}$  J,  $t = 85$  nm.

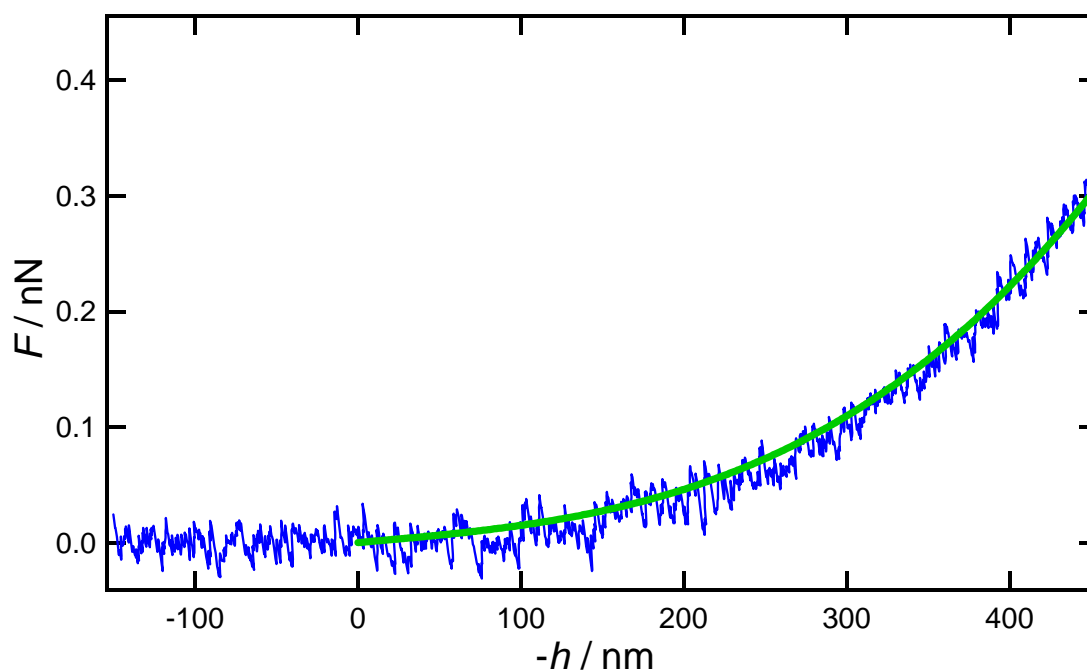

**Figure 2s.** Fit of the parameters of equation (3s) to an experimentally obtained force indentation curve taken on a pore covering apical cell-membrane. Parameters:  $R_{\text{pore}} = 600$  nm,  $R_{\text{tip}} = 20$  nm,  $E = 15.2$  kPa,  $\kappa = 7 \times 10^{-19}$  J,  $t = 85$  nm.

**Interpretation of the hysteresis between indentation and relaxation.** A three-body viscoelastic model with a time constant of  $\eta/k = 0.04$  s is used to qualitatively understand the observed indentation and relaxation behavior of pore spanning cellular membranes. A linear spring illustrating bending of the bilayer is connected in series to a nonlinear spring representing the stretching of the bilayer and a Kelvin-Voigt model consisting of a parallel combination of a dashpot ( $\eta$ ) and a spring ( $k$ ) leading to the following force indentation  $F^{ind}(h)$  or force relaxation  $F^{relax}(h)$  relations:

$$F^{ind}(h) = \frac{4\pi Et^3}{3(1-\nu^2)R_{pore}^2} h + ER_{pore} \frac{\pi}{3} t \left( \frac{h}{R_{pore}} \right)^3 + F_{KV}^{ind}(h)$$

$$F^{relax}(h) = \frac{4\pi Et^3}{3(1-\nu^2)R_{pore}^2} h + ER_{pore} \frac{\pi}{3} t \left( \frac{h}{R_{pore}} \right)^3 + F_{KV}^{relax}(h)$$

with

$F_{KV}^{ind}(h)$  and  $F_{KV}^{relax}(h)$  from solution of the Kelvin-Voigt model ( $F(t) = kh + \eta \frac{dh}{dt}$ )

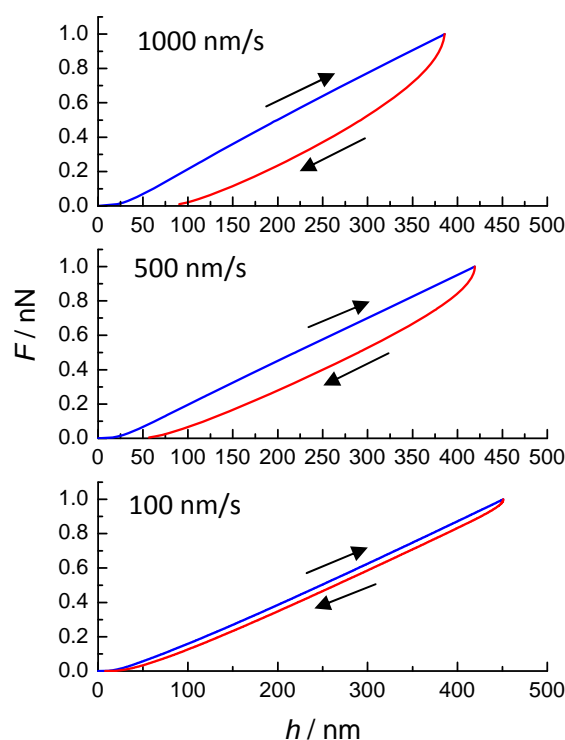

**Figure 3s.** Calculated indentation and relaxation curves of a nonlinear Kelvin-Voigt Model as a function of indentation velocity. Due to the small time constant (0.04 s) the hysteresis increases with increasing velocity as observed on the pore-spanning cell membrane.
